# Supplementary material for: Microfluidic bypass manometry: highly parallelized measurement of flow resistance of complex channel geometries and trapped droplets
Source: Royal Society of Chemistry journal article supplement (doi:10.1039/c7lc00889a), 2017-12-14
Supplement: c7lc00889a1.pdf [file c7lc00889a1.pdf]

## Microfluidic Bypass Manometry: Highly parallelized measurement of flow resistance of complex channel geometries and trapped droplets

Naureen Suteria, Mehdi Nekouei and Siva Vanapalli\*

Department of Chemical Engineering, Texas Tech University, Lubbock, TX

\*Corresponding author, Email: siva.vanapalli@ttu.edu

### SUPPLEMENTARY INFORMATION

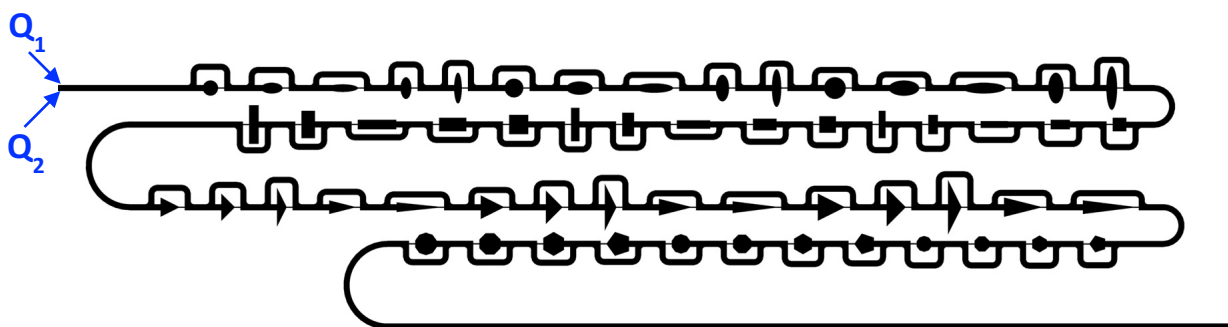

Figure SI.1: Schematic of the device used to determine flow resistance of trapped oil droplets in different shaped cavities. The circular, rectangular, triangular and polygonal traps are in rows 1-4, respectively.
